# Supplementary material
Source: PubMed Central journal article supplement (PMC3008638)
Supplement: supp_btq605_supplemental_file.pdf [file supp_btq605_supplemental_file.pdf]

## SUPPLEMENTAL FILE

### 5 MATHEMATICAL NOTATION

In this paper, we consider real variables. We use  $\mathbb{R}$  to denote the set of real numbers. Scalars are denoted by lower case letters, e.g.,  $s, t$ . Vectors in  $\mathbb{R}^n$  are denoted by either bold letters and numbers, or lower-case Greek letters, e.g.,  $\mathbf{1}, \mathbf{x}, \boldsymbol{\pi}$ , where  $\mathbf{1}$  denotes a vector all of whose components are equal to one.  $\mathbf{x}^t$  denotes the transpose of the vector  $\mathbf{x}$ . The notation  $x_i$  refers to the  $i$ th component of the vector  $\mathbf{x}$ . Matrices in  $\mathbb{R}^{m \times n}$  are denoted by either capital letters or upper-case Greek letters, e.g.,  $C, P, \Lambda$ .  $I$  stands for the identity matrix. If  $P \in \mathbb{R}^{m \times n}$ , then  $\text{vec}(P)$  transforms  $P$  into an  $nm$ -dimensional vector by stacking the columns. The equality and inequality symbols,  $=, \leq$  and  $\geq$  denote component-wise equality and inequality, respectively, for arrays of the same size. For example, if  $C$  is an  $m \times n$  matrix, then  $C \geq 0$  denotes the  $mn$  inequalities: each element of the matrix  $C$  is nonnegative. The curled inequality symbols,  $\preceq, \prec, \succeq, \succ$ , denote generalized matrix inequalities associated with the positive semi-definite cone. That is, if  $A, B \in \mathbb{R}^{n \times n}$ , then  $A \succeq B$  (resp.,  $A \succ B$ ) means that  $A - B$  is positive-semi-definite (resp., positive definite); and  $A \preceq B$  (resp.,  $A \prec B$ ) means that  $A - B$  is negative-semi-definite (resp., negative definite). We recall that a matrix  $A \in \mathbb{R}^{n \times n}$  is called positive-semi-definite (resp., positive definite) if  $\mathbf{x}^t A \mathbf{x} \geq 0$  (resp.,  $\mathbf{x}^t A \mathbf{x} > 0$ ) for all  $\mathbf{x} \in \mathbb{R}^n$  (resp.,  $\mathbf{x} \neq 0$ ). If  $-A$  is positive semi-definite (resp., positive definite), then  $A$  is called negative semi-definite (resp., negative definite).

#### PROOF OF PROPOSITION 1.

$$\begin{aligned} \pi_d^t &= \pi_0^t (I - CZ_0)^{-1} \\ \iff \pi_d^t (I - CZ_0) - \pi_0^t &= 0 \\ \iff [\pi_d^t (I - CZ_0) - \pi_0^t] Z_0^{-1} &= 0 \quad (27) \\ \iff \pi_d^t (I - P_0 + P_0^*) - \pi_d^t C - \pi_0^t (I - P_0 + P_0^*) &= 0 \\ \iff (\pi_d^t - \pi_d^t P_0 + \pi_0^t) - \pi_d^t C - (\pi_0^t - \pi_0^t + \pi_0^t) & \quad (28) \\ \iff \pi_d^t &= \pi_d^t (P_0 + C), \end{aligned}$$

where Eq. (27) follows from the fact that  $Z_0$  is invertible, and Eq. (28) follows from the properties:  $\pi_d^t P_0^* = \pi_d^t \mathbf{1} \pi_0^t = \pi_0^t$ ;  $\pi_0^t P_0 = \pi_0^t$ ; and  $\pi_0^t P_0^* = \pi_0^t$ .

**PROOF OF PROPOSITION 2.** It is straightforward to check that the perturbation matrix  $C = (\mathbf{1} \pi_d^t - P_0) \in \mathcal{D}$ . That is we have (i)  $\pi_d^t = \pi_d^t (P_0 + C)$ ; (ii)  $C \mathbf{1} = \mathbf{0}$ ; (iii)  $P_0 + C \geq 0$ . Moreover, the perturbed matrix  $P_0 + C = \mathbf{1} \pi_d^t$  is a stochastic matrix with rank one. Therefore, it has a simple eigenvalue 1 corresponding to eigenvector  $\mathbf{1}$ , and eigenvalue 0 with multiplicity  $n - 1$ . Hence, its SLEM = 0.

**PROOF OF PROPOSITION 3.** For any vector  $\mathbf{f}$ , we introduce its unique direct sum decomposition  $\mathbf{f} = \alpha_f \mathbf{1} + \mathbf{f}^\perp$ , where  $\alpha_f = \pi_d^t \mathbf{f}$  and  $\mathbf{f}^\perp \perp \pi_d$ . It is easy to check that  $\mathbf{f}^\perp$  is proportional to  $\mathbf{1}$  if and only if  $\mathbf{f}^\perp = \mathbf{0}$ .

Let  $\psi = \alpha_\psi \mathbf{1} + \psi^\perp$  be a non-trivial eigenvector (i.e.,  $\psi^\perp \neq \mathbf{0}$ ) of  $P_E^*$  with eigenvalue  $\mu$ . We will look for a vector  $\phi$ , in the form

$\phi = \psi + c \mathbf{1}$ , that satisfies  $P(s)\phi = (1 - s)\mu\phi$ . We have

$$\begin{aligned} P(s)\phi &= P(s)\psi + c \mathbf{1} \quad (29) \\ &= (1 - s)\mu\psi + s\alpha_\psi \mathbf{1} + c \mathbf{1} \quad (30) \\ &= (1 - s)\mu\phi + (s\alpha_\psi + c - (1 - s)\mu c) \mathbf{1}, \quad (31) \end{aligned}$$

where Eq. (29) follows from the fact that  $P(s)$  is stochastic, i.e.,  $P(s)\mathbf{1} = \mathbf{1}$ , and Eq. (30) is obtained by replacing  $P(s)$  by its expression in Eq. (15). Therefore, if we chose  $c = \frac{s\alpha_\psi}{(1-s)\mu-1}$ , we obtain  $P(s)\phi = (1 - s)\mu\phi$ .

Let now  $\phi = \alpha_\phi \mathbf{1} + \phi^\perp$  be a non trivial eigenvector of  $P(s)$  with eigenvalue  $\lambda$ . In particular,  $\phi^\perp \neq \mathbf{0}$ . We first show that  $\lambda \neq (1 - s)$ . From Eq. (15), we have

$$\begin{aligned} P(s)\phi &= (1 - s)P_E^* \phi + s\alpha_\phi \mathbf{1} \quad (32) \\ &= (1 - s)P_E^* \phi^\perp + (1 - s)\alpha_\phi \mathbf{1} + s\alpha_\phi \mathbf{1}. \quad (33) \end{aligned}$$

On the other hand, if  $\lambda = 1 - s$ , then we would have

$$\begin{aligned} P(s)\phi &= (1 - s)\phi \quad (34) \\ &= (1 - s)\alpha_\phi \mathbf{1} + (1 - s)\phi^\perp. \quad (35) \end{aligned}$$

By equating Eqs. (33) and (35), we obtain

$$P_E^* \phi^\perp = \phi^\perp - \frac{s\alpha_\phi}{1-s} \mathbf{1}. \quad (36)$$

It follows that, for any positive integer  $j$  we have

$$P_E^{*j} \phi^\perp = P_E^{*(j-1)} \phi^\perp - \frac{s\alpha_\phi}{1-s} \mathbf{1}. \quad (37)$$

Taking the limit as  $j \rightarrow \infty$ , and because  $P_E^*$  is ergodic, we get

$$P_E^{*\infty} \phi^\perp = P_E^{*\infty} \phi^\perp - \frac{s\alpha_\phi}{1-s} \mathbf{1}. \quad (38)$$

Thus,  $s\alpha_\phi = 0$ , which implies, from Eq. (36), that  $P_E^* \phi^\perp = \phi^\perp$ . Hence,  $\phi^\perp$  is an eigenvector of  $P_E^*$  corresponding to eigenvalue 1. Therefore,  $\phi^\perp$  must be proportional to  $\mathbf{1}$ . We recall that  $\phi^\perp$  is proportional to  $\mathbf{1}$  if and only if  $\phi^\perp = \mathbf{0}$ . This results in a contradiction because of the fact that  $\phi^\perp \neq \mathbf{0}$ . Therefore, we conclude that  $\lambda \neq 1 - s$ .

Now, we consider  $\lambda \neq 1 - s$ , we will find  $\psi$  in the form  $\psi = \phi + c \mathbf{1}$ , that satisfies  $P_E^* \psi = \frac{\lambda}{1-s} \psi$ . We have

$$\begin{aligned} P_E^* \psi &= P_E^* \phi + c \mathbf{1} \quad (39) \\ &= \frac{\lambda}{1-s} \phi - \frac{s\alpha_\phi}{1-s} \mathbf{1} + c \mathbf{1} \quad (40) \\ &= \frac{\lambda}{1-s} \psi + \left( -\frac{\lambda}{1-s} c - \frac{s\alpha_\phi}{1-s} + c \right) \mathbf{1}, \quad (41) \end{aligned}$$

where Eq. (39) follows from the stochasticity of  $P_E^*$  and Eq. (40) is obtained by replacing  $P_E^*$  by its expression in Eq. (15) and using the fact that  $\phi$  is an eigenvector of  $P(s)$  with eigenvalue  $\lambda$ . Finally, Eq. (41) follows by replacing  $\phi = \psi - c \mathbf{1}$ . Therefore, if we chose  $c = \frac{s\alpha_\phi}{1-s-\lambda}$ , we obtain  $P_E^* \psi = \frac{\lambda}{1-s} \psi$ .

**PROOF OF PROPOSITION 4.**  $\|C(s)\|_2$  is a convex function in  $s$ , which reaches its minimum at  $s = 0$ . Therefore, it must be increasing for  $s \geq 0$  (Boyd and Vandenberghe, 2003).

We also provide an alternative proof as follows: Let  $A = P_E^* - P_0$  and  $B = \mathbf{1}\pi_d^t - P_E^*$ . Then, from Eq. (16),

$$C(s) = A + Bs. \quad (42)$$

By construction, we have for all  $s \geq 0$ ,

$$\|C(s)\|_2 \geq \|P_E^* - P_0\|_2 = \|C(0)\|_2 = \|A\|_2 \iff \max_{\mathbf{x}: \|\mathbf{x}\|=1} \langle (A + sB)^t(A + sB)\mathbf{x}, \mathbf{x} \rangle \geq \max_{\mathbf{x}: \|\mathbf{x}\|=1} \langle A^t A \mathbf{x}, \mathbf{x} \rangle, \quad (43)$$

where the right hand side equivalence follows from the definition of the spectral norm given in Eq. (8). Let  $\mathbf{x}_s$  be such that  $\|\mathbf{x}_s\| = 1$  and

$$\max_{\mathbf{x}: \|\mathbf{x}\|=1} \langle (A + sB)^t(A + sB)\mathbf{x}, \mathbf{x} \rangle = \langle (A + sB)^t(A + sB)\mathbf{x}_s, \mathbf{x}_s \rangle. \quad (44)$$

Then,

$$\langle (A + sB)^t(A + sB)\mathbf{x}_s, \mathbf{x}_s \rangle \geq \langle A^t A \mathbf{x}_s, \mathbf{x}_s \rangle, \quad (45)$$

which means

$$\langle (A^t B + B^t A + sB^t B)\mathbf{x}_s, \mathbf{x}_s \rangle \geq 0. \quad (46)$$

Let  $\tilde{s} \geq s$ . We need to show that

$$\max_{\mathbf{x}: \|\mathbf{x}\|=1} \langle (A + \tilde{s}B)^t(A + \tilde{s}B)\mathbf{x}, \mathbf{x} \rangle \geq \langle (A + sB)^t(A + sB)\mathbf{x}_s, \mathbf{x}_s \rangle. \quad (47)$$

It is sufficient to show that

$$\langle (A + \tilde{s}B)^t(A + \tilde{s}B)\mathbf{x}_s, \mathbf{x}_s \rangle \geq \langle (A + sB)^t(A + sB)\mathbf{x}_s, \mathbf{x}_s \rangle. \quad (48)$$

But,

$$\begin{aligned} \langle (A + \tilde{s}B)^t(A + \tilde{s}B)\mathbf{x}_s, \mathbf{x}_s \rangle - \langle (A + sB)^t(A + sB)\mathbf{x}_s, \mathbf{x}_s \rangle \\ = (\tilde{s} - s) \langle (A^t B + B^t A + sB^t B + \tilde{s}B^t B)\mathbf{x}_s, \mathbf{x}_s \rangle, \end{aligned}$$

which is positive because of Eq. (46).

**PROOF OF PROPOSITION 5.** For  $0 \leq s \leq 1$ , we have the following three properties

$$\pi_d(s)^t Q(s) = \pi_d(s)^t \quad (49)$$

$$\pi_d(s) \mathbf{1} = 1 \quad (50)$$

$$\pi_d(s) \geq 0. \quad (51)$$

Because  $Q(s)$  is ergodic, we know that such  $\pi_d(s)$  exists and is unique. Let

$$\phi = \pi_d(s) - ((1 - s)\pi_0 + s\pi_d). \quad (52)$$

Then, we have

$$\phi^t Q(s) = \pi_d(s)^t - (1 - s)^2 \pi_0^t - \quad (53)$$

$$s(1 - s)\pi_d^t P_0 - s(1 - s)\pi_d^t - s^2 \pi_d^t$$

$$= \phi^t + s(1 - s)(\pi_0^t - \pi_d^t P_0) \quad (54)$$

$$= \phi^t + s(1 - s)(\pi_0^t - \pi_d^t) P_0, \quad (55)$$

where Eq. (55) follows from the fact that  $\pi_0^t P_0 = \pi_0^t$ . Next, we notice that  $\phi^t \mathbf{1} = 0$ . Thus, from Eq. (20), we obtain

$$\phi^t Q(s) = (1 - s)\phi^t P_0. \quad (56)$$

By equating Eqs. (55) and (56), we obtain

$$\phi^t [I - (1 - s)P_0] = s(1 - s)(\pi_d^t - \pi_0^t) P_0. \quad (57)$$

Observe that for  $s > 0$ , 1 is not an eigenvalue of  $(1 - s)P_0$ . Hence,  $I - (1 - s)P_0$  is invertible, and we have

$$\phi = s(1 - s)[I - (1 - s)P_0]^{-1} P_0^t (\pi_d - \pi_0). \quad (58)$$

From Eq. (52), we have

$$\pi_d(s) - \pi_d = \phi + (1 - s)(\pi_0 - \pi_d). \quad (59)$$

Replacing  $\phi$  by its expression in Eq. (58), Eq. (59) can be written as

$$\pi_d(s) - \pi_d = (1 - s) (I - s(I - (1 - s)P_0)^t)^{-1} P_0^t (\pi_0 - \pi_d). \quad (60)$$

That is, by factoring by  $(I - (1 - s)P_0^t)^{-1}$ ,

$$\pi_d(s) - \pi_d = (1 - s)(I - (1 - s)P_0^t)^{-1} (I - P_0^t)(\pi_0 - \pi_d). \quad (61)$$

If  $P_0$  is symmetric, then by the spectral theorem we have  $\|P_0\|_2 = \lambda_{\max}(P_0) = 1$ , and by the triangle inequality,

$$\|(I - (1 - s)P_0^t)^{-1} (I - P_0^t)\|_2 \leq \frac{2}{2 - s},$$

and thus

$$\|\pi_d(s) - \pi_d\| \leq \frac{2(1 - s)}{2 - s} \|\pi_0 - \pi_d\|.$$

In the case of a non-symmetric matrix  $P_0$ , we use geometric progression:

$$[I - (1 - s)P_0^t]^{-1} = \sum_{k=0}^{\infty} (1 - s)^k P_0^t. \quad (62)$$

We note that the last series is convergent for any  $0 < s \leq 1$  because  $P_0^k$  has a limit as  $k \rightarrow \infty$ . Equation (60) becomes then

$$\pi_d(s) - \pi_d = (1 - s) \left( I - s \sum_{k=0}^{\infty} (1 - s)^k (P_0^t)^{k+1} \right) (\pi_0 - \pi_d). \quad (63)$$

By noting that  $\sup_{k \geq 1} \|P_0^k\|_2 = \sup_{k \geq 1} \|(P_0^t)^k\|_2$  is finite, we have the desired upper bound on  $\|\pi_d(s) - \pi_d\|$ .
